# Supplementary material
Source: PubMed Central journal article supplement (PMC6859251)
Supplement: mmc1.pdf [file mmc1.pdf]

## In-Hospital Deaths Among Adults With Community-Acquired Pneumonia

*Grant W. Waterer, MBBS, PhD; Wesley H. Self, MD, MPH; D. Mark Courtney, MD; Carlos G. Grijalva, MD, MPH; Robert A. Balk, MD; Timothy D. Girard, MD; Sherene S. Fakhran, MD; Christopher Trabue, MD; Paul McNabb, MD; Evan J. Anderson, MD; Derek J. Williams, MD, MPH; Anna M. Bramley, MPH; Seema Jain, MD; Kathryn M. Edwards, MD; and Richard G. Wunderink, MD*

CHEST 2018; 154(3):628-635

*Online supplements are not copyedited prior to posting and the author(s) take full responsibility for the accuracy of all data.*

© 2018 AMERICAN COLLEGE OF CHEST PHYSICIANS. Reproduction of this article is prohibited without written permission from the American College of Chest Physicians. See online for more details. DOI: 10.1016/j.chest.2018.05.021

**Appendix 1:** Criteria used to guide determinations for cause of death and potential lapses in quality of care.

| Causes of Death                                                                                                                                                                                                                                                                                                                                                                      | Definitions/ explanations                                                                                                                                             | Potential Lapses in Quality of Care                                                                                                                                                        |
|--------------------------------------------------------------------------------------------------------------------------------------------------------------------------------------------------------------------------------------------------------------------------------------------------------------------------------------------------------------------------------------|-----------------------------------------------------------------------------------------------------------------------------------------------------------------------|--------------------------------------------------------------------------------------------------------------------------------------------------------------------------------------------|
| <b>DIRECTLY RELATED TO PNEUMONIA</b>                                                                                                                                                                                                                                                                                                                                                 |                                                                                                                                                                       |                                                                                                                                                                                            |
| 1. Septic shock                                                                                                                                                                                                                                                                                                                                                                      | Remains on vasopressors until death, with or without MOSF                                                                                                             | 1. Time to first appropriate antibiotic dose < 1h if initially in shock, < 6h if not in shock                                                                                              |
| 2. Respiratory Failure <ul style="list-style-type: none"> <li>a. hypoxemic respiratory failure</li> <li>b. massive hemoptysis</li> <li>c. pneumothorax</li> <li>d. prolonged ventilation with withdrawal               <ul style="list-style-type: none"> <li>1) with underlying cardiovascular disease</li> <li>2) without underlying cardiovascular disease</li> </ul> </li> </ul> | May be withholding or withdrawal of specific treatments, such as antibiotics, mechanical ventilation or renal replacement therapy                                     | 2. Antibiotics consistent with ATS/IDSA guidelines <ul style="list-style-type: none"> <li>a. Culture positive</li> <li>b. Culture negative</li> <li>c. Anti-viral for influenza</li> </ul> |
| 3. Multi-organ failure with withdrawal                                                                                                                                                                                                                                                                                                                                               | May be withholding or withdrawal of specific treatments, such as antibiotics, mechanical ventilation or renal replacement therapy                                     | 3. Delayed ICU transfer <ul style="list-style-type: none"> <li>a. Initial severe CAP by ATS criteria without direct ICU admit</li> <li>b. Lactate measurement</li> </ul>                   |
| 4. Cardiopulmonary arrest with resuscitation                                                                                                                                                                                                                                                                                                                                         | CAP not stabilized prior to arrest (ie patient in ICU for entire hospitalization prior to arrest). Patient never stabilized post arrest                               | 4. Inadequate resuscitation <ul style="list-style-type: none"> <li>a. persistent lactic acidosis/AG</li> <li>b. persistently elevated BUN/Cr</li> </ul>                                    |
| 5. Endocarditis with hemodynamic compromise                                                                                                                                                                                                                                                                                                                                          | With or without surgery                                                                                                                                               | 5. Assessment of oxygenation                                                                                                                                                               |
| <b>INDIRECTLY RELATED TO PNEUMONIA</b>                                                                                                                                                                                                                                                                                                                                               |                                                                                                                                                                       |                                                                                                                                                                                            |
| 6. Acute cardiovascular disease <ul style="list-style-type: none"> <li>a. cardiogenic shock</li> <li>b. arrhythmia</li> <li>c. pulmonary edema with respiratory failure</li> <li>d. pulmonary embolism</li> <li>e. cardiac arrest/sudden death</li> </ul>                                                                                                                            | New cardiovascular disease with onset of pneumonia; if cardiovascular disease was pre-existing, code as #2.d.1. above                                                 | 1. DVT prophylaxis on admission                                                                                                                                                            |
| 7. Stroke <ul style="list-style-type: none"> <li>a. hemorrhagic</li> <li>b. thrombotic</li> <li>c. embolic</li> </ul>                                                                                                                                                                                                                                                                | Primary stroke, not septic emboli from distant infection                                                                                                              | 2. EKG changes on admission without investigation for coronary disease                                                                                                                     |
| 8. Acute Renal Failure <ul style="list-style-type: none"> <li>a. hyperkalemia</li> <li>b. limitation of renal replacement therapy</li> </ul>                                                                                                                                                                                                                                         | Renal failure as the primary cause of death                                                                                                                           | 3. Troponin elevation on admission without investigation for coronary disease                                                                                                              |
| 9. Secondary infection <ul style="list-style-type: none"> <li>a. nosocomial pneumonia</li> <li>b. other non-pulmonary nosocomial sepsis</li> </ul>                                                                                                                                                                                                                                   | Development of secondary infection after stabilization of initial CAP. If initial CAP never stabilized (patient on medical floor off life support), code as #3 above. | 4. Chronic cardiovascular medications discontinued on admission                                                                                                                            |
| <b>UNRELATED TO PNEUMONIA</b>                                                                                                                                                                                                                                                                                                                                                        |                                                                                                                                                                       |                                                                                                                                                                                            |
| 10. Cancer                                                                                                                                                                                                                                                                                                                                                                           |                                                                                                                                                                       | 5. Nephrotoxic agents: contrast media, medications                                                                                                                                         |
| 11. Cirrhosis                                                                                                                                                                                                                                                                                                                                                                        |                                                                                                                                                                       | 6. Central line associated infection                                                                                                                                                       |
| 12. Chronic neurologic conditions                                                                                                                                                                                                                                                                                                                                                    |                                                                                                                                                                       | 7. Urinary catheter associated infection                                                                                                                                                   |
| 13. Other                                                                                                                                                                                                                                                                                                                                                                            |                                                                                                                                                                       | 8. Inadequate initial resuscitation <ul style="list-style-type: none"> <li>a. persistent lactic acidosis</li> <li>b. persistently elevated BUN/Cr</li> </ul>                               |
